# Supplementary material
Source: Springer Nature journal article supplement (https://www.springermedizin.de/resource/supplementary/13229_2013_119_MOESM2_ESM.pdf/9676210)

(A)

|           | Pleasant                                                                                                                                                                                                                                                                                                                                   | Unpleasant                                                                                                                                                                                                                                                                                                                                   |
|-----------|--------------------------------------------------------------------------------------------------------------------------------------------------------------------------------------------------------------------------------------------------------------------------------------------------------------------------------------------|----------------------------------------------------------------------------------------------------------------------------------------------------------------------------------------------------------------------------------------------------------------------------------------------------------------------------------------------|
| Human     |  <br>  |  <br>  |
| Non-human |  <br>  |  <br>  |

(B)

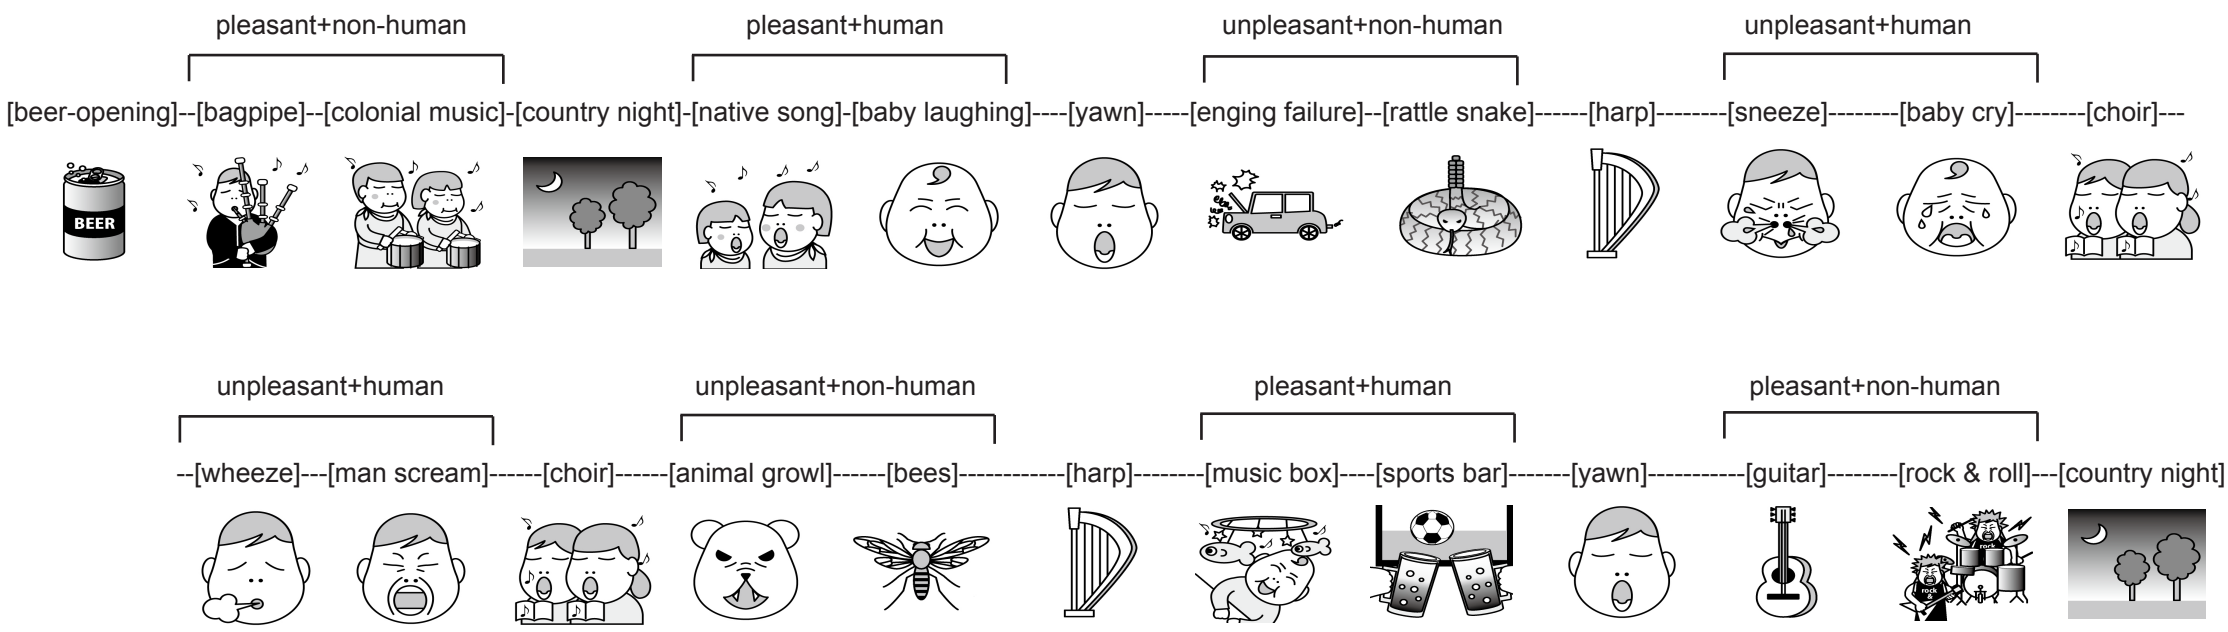

Supplement: MOESM2 [file 9676210]
